# Supplementary material
Source: MDPI journal article supplement (https://www.mdpi.com/2227-7390/11/3/602)
Supplement: s1 [file s1]

## 1. Supplementary Tables

**Table S1.** The performance evaluation results of 7 feature encoding using XGBoost.

| XGBoost   |          |          |       |
|-----------|----------|----------|-------|
| Feature   | Accuracy | F1-score | AUC   |
| PSTNPSSMC | 0.645    | 0.735    | 0.895 |
| RCKmer    | 0.468    | 0.303    | 0.627 |
| CKSNAP    | 0.439    | 0.280    | 0.600 |
| NAC       | 0.403    | 0.261    | 0.573 |
| ENAC      | 0.422    | 0.254    | 0.577 |
| NCP       | 0.417    | 0.235    | 0.586 |
| ANF       | 0.318    | 0.236    | 0.524 |

**Table S2.** The performance evaluation results of 7 feature encoding using SVM.

| SVM       |          |          |       |
|-----------|----------|----------|-------|
| Feature   | Accuracy | F1-score | AUC   |
| PSTNPSSMC | 0.602    | 0.700    | 0.882 |
| RCKmer    | 0.472    | 0.232    | 0.647 |
| CKSNAP    | 0.457    | 0.215    | 0.611 |
| NAC       | 0.453    | 0.205    | 0.592 |
| ENAC      | 0.432    | 0.205    | 0.622 |
| NCP       | 0.453    | 0.211    | 0.614 |
| ANF       | 0.352    | 0.151    | 0.466 |

**Table S3.** The performance evaluation results of 7 feature encoding using Random Forest.

| Random Forest |          |          |       |
|---------------|----------|----------|-------|
| Feature       | Accuracy | F1-score | AUC   |
| PSTNPSSMC     | 0.632    | 0.752    | 0.890 |
| RCKmer        | 0.479    | 0.280    | 0.634 |
| CKSNAP        | 0.486    | 0.286    | 0.612 |
| NAC           | 0.426    | 0.272    | 0.603 |
| ENAC          | 0.454    | 0.245    | 0.591 |
| NCP           | 0.442    | 0.239    | 0.580 |
| ANF           | 0.400    | 0.220    | 0.521 |

**Table S4.** The performance evaluation results of 7 feature encoding using Logical regression.

| Logical regression |          |          |     |
|--------------------|----------|----------|-----|
| Feature            | Accuracy | F1-score | AUC |

|           |       |       |       |
|-----------|-------|-------|-------|
| PSTNPSSMC | 0.395 | 0.242 | 0.839 |
| RCKmer    | 0.478 | 0.215 | 0.645 |
| CKSNAP    | 0.468 | 0.212 | 0.643 |
| NAC       | 0.452 | 0.205 | 0.634 |
| ENAC      | 0.376 | 0.261 | 0.575 |
| NCP       | 0.376 | 0.247 | 0.547 |
| ANF       | 0.353 | 0.169 | 0.487 |

**Table S5.** The performance evaluation results of 7 feature encoding using Multilayer perceptron.

| Multilayer perceptron |          |          |       |
|-----------------------|----------|----------|-------|
| Feature               | Accuracy | F1-score | AUC   |
| PSTNPSSMC             | 0.557    | 0.664    | 0.854 |
| RCKmer                | 0.481    | 0.219    | 0.655 |
| CKSNAP                | 0.465    | 0.231    | 0.650 |
| NAC                   | 0.463    | 0.211    | 0.638 |
| ENAC                  | 0.388    | 0.266    | 0.579 |
| NCP                   | 0.393    | 0.244    | 0.558 |
| ANF                   | 0.350    | 0.177    | 0.493 |

**Table S6.** The performance evaluation results of 5 optimal candidate base classifiers with their best feature combination.

| Methods                                 | ACC   | AUC   | Macro F-measure |
|-----------------------------------------|-------|-------|-----------------|
| XGBoost(PSTNPSSMC+RCKmer)               | 0.687 | 0.910 | 0.773           |
| SVM(PSTNPSSMC+RCKmer)                   | 0.632 | 0.896 | 0.711           |
| Random Forest(PSTNPSSMC+RCKmer)         | 0.655 | 0.901 | 0.752           |
| Logical regression(RCKmer+CKSNAP)       | 0.477 | 0.646 | 0.215           |
| Multilayer perceptron(PSTNPSSMC+RCKmer) | 0.595 | 0.873 | 0.687           |

**Table S7.**Hyper-parameter values of the optimal candidate base classifiers.

|               |                  |                  |
|---------------|------------------|------------------|
| XGBoost       | Feature type     | PSTNPSSMC+RCKmer |
|               | learning_rate    | 0.11             |
|               | n_estimators     | 100              |
|               | max_depth        | 3                |
|               | subsample        | 1                |
|               | colsample_bytree | 0.8              |
|               | gamma            | 0                |
| Random Forest | Feature type     | PSTNPSSMC+RCKmer |

|                       |               |                  |
|-----------------------|---------------|------------------|
|                       | bootstrap     | False            |
|                       | n_jobs        | 1                |
|                       | n_estimators  | 400              |
| SVM                   | Feature type  | PSTNPSSMC+RCKmer |
|                       | C             | 15.0             |
|                       | gamma         | 1.0              |
|                       | probability   | True             |
| Logical Regression    | Feature type  | RCKmer+CKSNAP    |
|                       | C             | 1e5              |
|                       | penalty       | L2               |
|                       | tol           | 0.0001           |
| Multilayer perceptron | Feature type  | PSTNPSSMC+RCKmer |
|                       | n_epochs      | 200              |
|                       | Learning_rate | 0.016            |
|                       | n_hidden      | 32               |
|                       | Activation    | relu             |
|                       | Optimizer     | adam             |

**Table S8.** The performance of 5 fold cross-validation under 10 different random seeds

| KFold random_state | Accuracy | F1-score | AUC   |
|--------------------|----------|----------|-------|
| 1001               | 0.710    | 0.802    | 0.904 |
| 2001               | 0.706    | 0.794    | 0.905 |
| 2012               | 0.706    | 0.786    | 0.904 |
| 3001               | 0.689    | 0.782    | 0.895 |
| 4001               | 0.688    | 0.778    | 0.896 |
| 5001               | 0.687    | 0.775    | 0.900 |
| 6001               | 0.703    | 0.788    | 0.904 |
| 7001               | 0.690    | 0.785    | 0.897 |
| 8001               | 0.715    | 0.808    | 0.907 |
| 9001               | 0.687    | 0.778    | 0.897 |
| Average            | 0.698    | 0.788    | 0.901 |

## 2.Supplementary figures

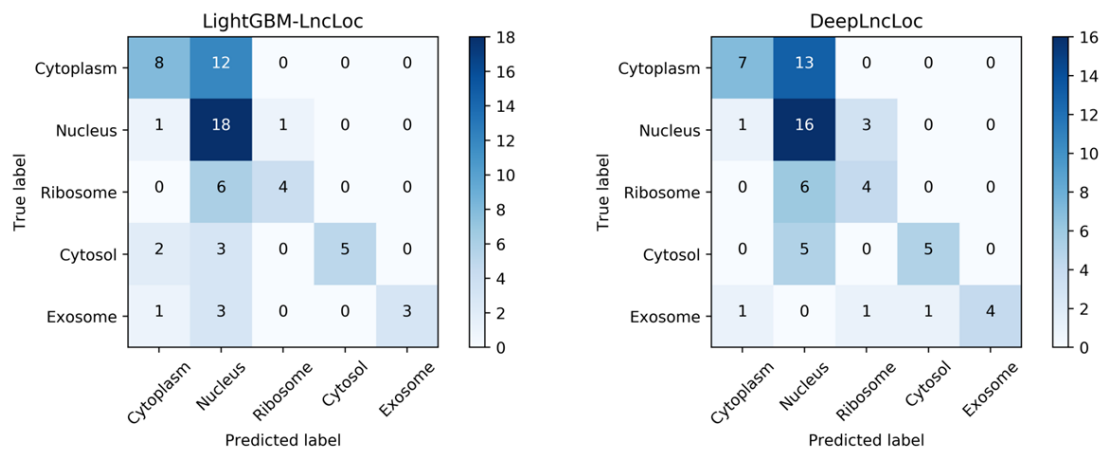

**Figure S1.** Confusion matrix of LightGBM-Lncloc with DeepLncLoc on the test set. (a) LightGBM-Lncloc, (b) DeepLncLoc. In the confusion matrix, the horizontal coordinates represent the predicted labels and the vertical coordinates represent the true labels. The diagonal line represents the number of correctly predicted samples.

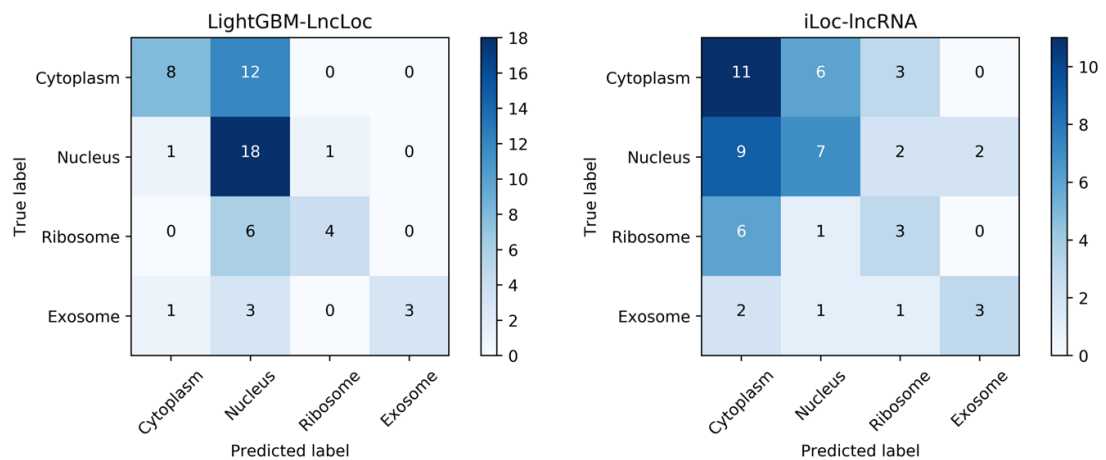

**Figure S2.** Confusion matrix of LightGBM-Lncloc with iLoc-lncRNA on the test set. (a) LightGBM-Lncloc, (b) iLoc-lncRNA. In the confusion matrix, the horizontal coordinates represent the predicted labels and the vertical coordinates represent the true labels. The diagonal line represents the number of correctly predicted samples.
